# Supplementary material for: Peptide Aggregation Induced Immunogenic Rupture (PAIIR)
Source: PubMed Central journal article supplement (PMC9313945; doi:10.1002/advs.202105868), 2022-05-22
Supplement: ADVS-9-2105868-s001.pdf [file ADVS-9-2105868-s001.pdf]

## Peptide Aggregation Induced Immunogenic Rupture (PAIRR)

Gokhan Gunay,<sup>1</sup> Seren Hamsici,<sup>1</sup> Gillian A. Lang,<sup>3</sup> Mark L. Lang,<sup>3</sup> Susan Kovats,<sup>3,4</sup> Handan Acar\*<sup>1,2</sup>

1 Stephenson School of Biomedical Engineering, University of Oklahoma, Norman, OK, 73069, US

2 Stephenson Cancer Center, University of Oklahoma Health Sciences Center Oklahoma City, OK, 73104, US

3 Microbiology and Immunology, University of Oklahoma Health Sciences Center, Oklahoma City, OK, 73104 USA

4 Oklahoma Medical Research Foundation, Oklahoma City, OK, 73104 USA

Email address: [hacar@ou.edu](mailto:hacar@ou.edu)

KFFVVK

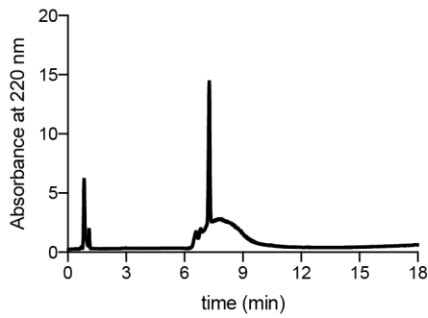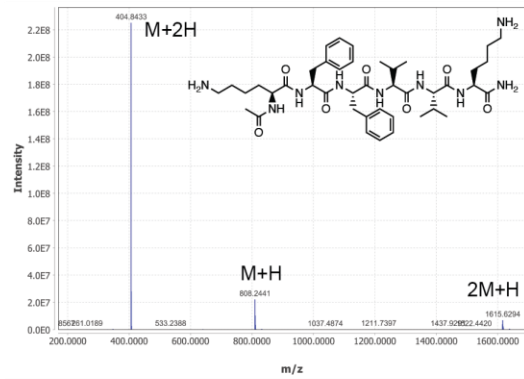

KFFLLK

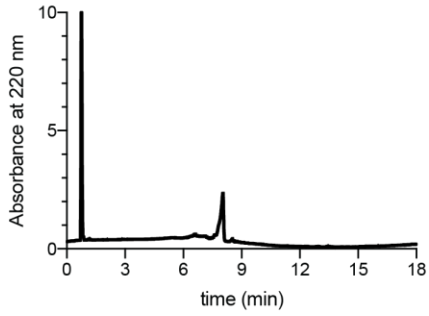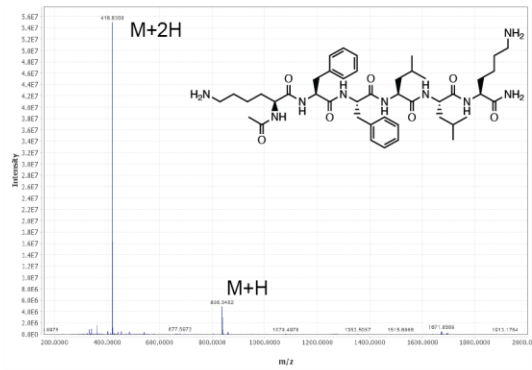

EFFVVE

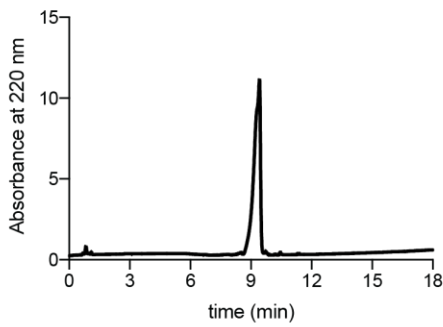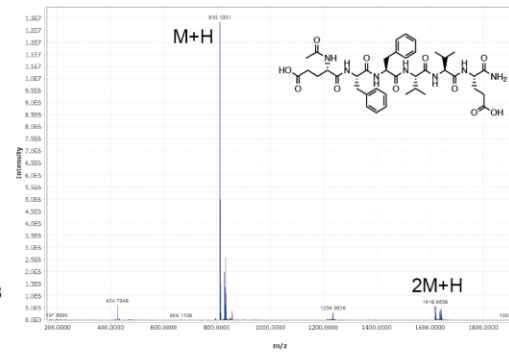

EFFLLE

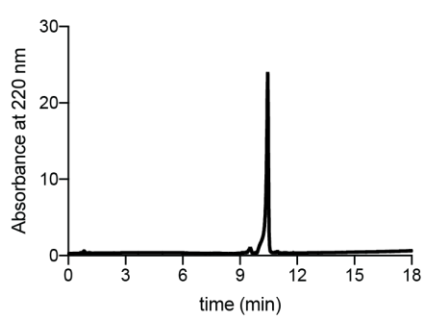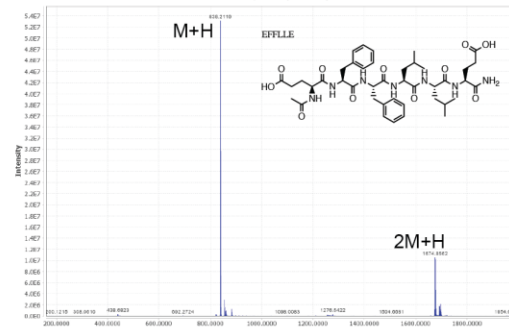

Fig. S1: LC and MS analysis of LL and VV peptides

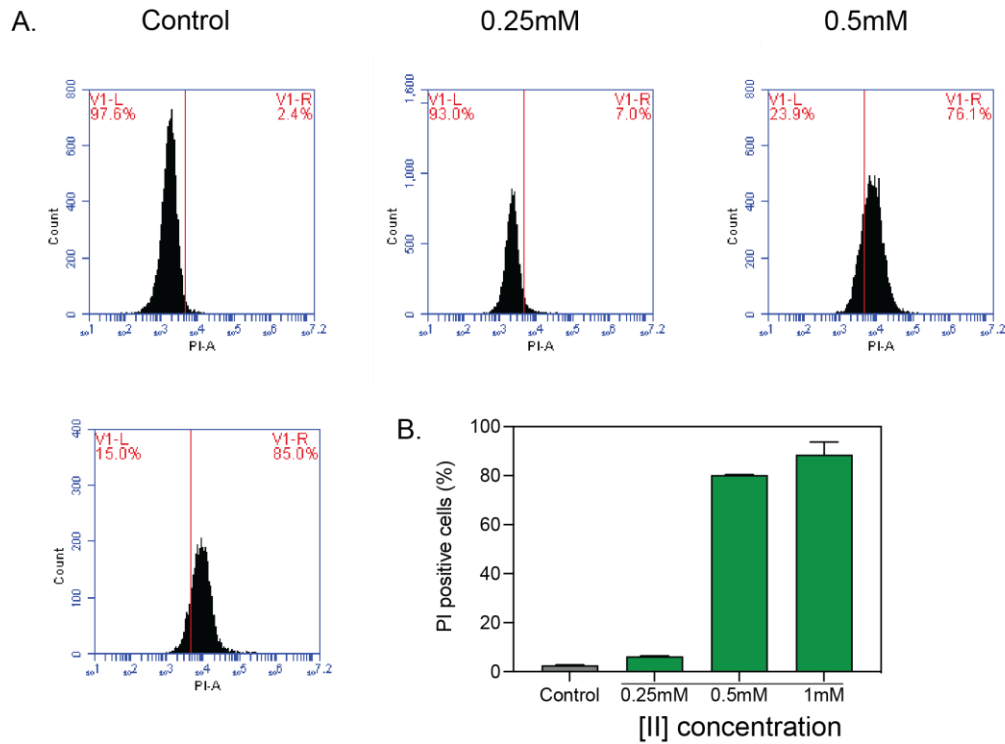

Figure S2: Propidium iodide (PI) uptake analysis by using flow cytometry. Representative histograms of untreated cells and cells treated with 0.25-0.5 and 1 mM [II] peptide for 6h (A). Percent (PI) positive cells at 6h.

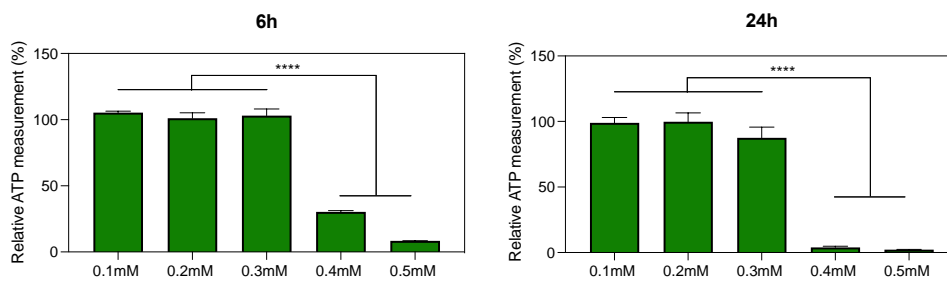

Figure S3: 6h and 24h cell viability measurements of OVCAR-8 cells treated with 0.1, 0.2, 0.3, 0.4 and 0.5 mM [II] peptide. Statistical analysis was done by one-way analysis of variance (ANOVA) with Tukey's multiple-comparison test. Data shown are mean  $\pm$  SD, \*\*\*\*p<0.0001. n=3 replicates.

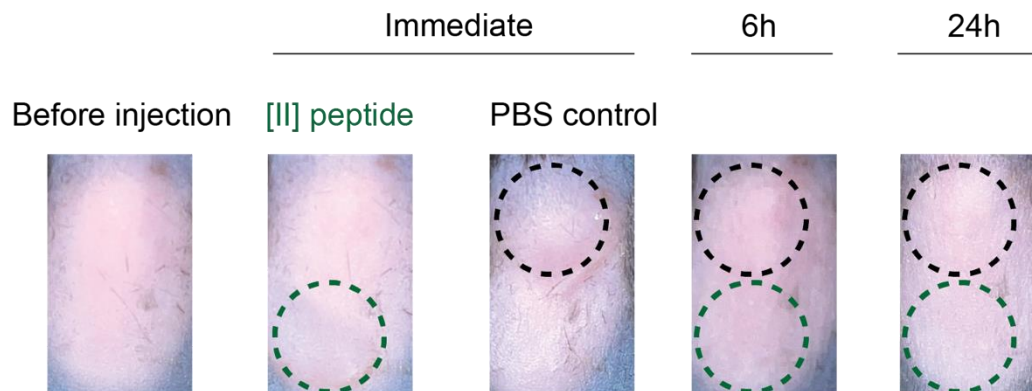

Figure S4: Effect of [II] peptide injection on skin. [II] peptide and PBS control were injected and skin was monitored immediately after injection followed by 6 and 24h.

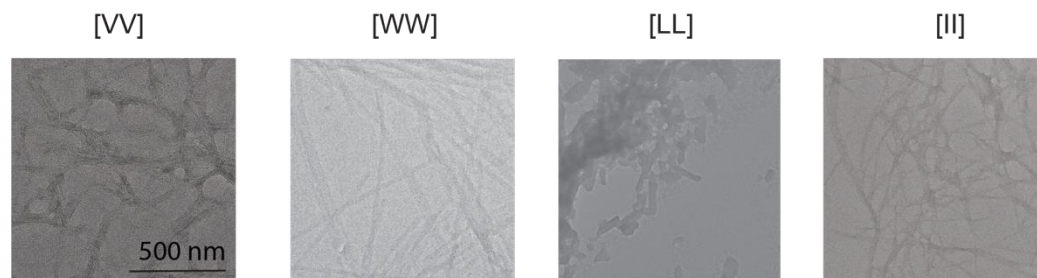

Figure S5: TEM images of [VV], [WW], [LL] and [II] peptides. Scale bar: 500 nm.
